# Supplementary material for: Characterization of an Atypical Trypanosoma brucei Hsp70 Demonstrates Its Cytosolic-Nuclear Localization and Modulation by Quercetin and Methylene Blue
Source: MDPI journal article supplement (doi:10.3390/ijms22136776), 2021-06-24
Supplement: s1 [file s1]

```

EcDnaK      1  -----MGKIIIGIDLGTNTSCVIGMDGTTPTPVLENAGDRTTPSIIAITDGE
TbHsp70.c   1  -----MTYEGAIIGDLGTTTSCVGVGNONEVEIIANDQGNRTTPSYVAFT-NNE
TbHsp70.4   1  -----MPAPAIIGDLGTTTSCVGVGNKNDQVEIANDQGNRTTPSYVSTFTE
TcHsp70B    1  -----MTYEGAIIGDLGTTTSCVGVGNONEVEIIANDQGSRTTPSYVAFT-DTE
TbHsp70      1  -----MTYEGAIIGDLGTTTSCVGVGNONEVEIIANDQGNRTTPSYVAFT-DTE
PfHsp70-1   1  MASAKGSKPNLPESNIAIIGDLGTTTSCVGVGNONEVEIIANDQGNRTTPSYVAFT-DTE
HsHSPA6     1  -----MQAPREIAIIGDLGTTTSCVGVGNONEVEIIANDQGNRTTPSYVAFT-DTE
HsHSPA1A    1  -----MAKAAAIIGDLGTTTSCVGVGNONEVEIIANDQGNRTTPSYVAFT-DTE
BtHsc70     1  -----MSKGPAAIIGDLGTTTSCVGVGNONEVEIIANDQGNRTTPSYVAFT-DTE

```

[illegible]

```

EcDnaK      107  ---GQKMAFPQISAEVLKMKMKTAEDYLGEFVTEAVITVPAYFNDSQRQATKDAGTIAGL
TbHsp70.c   109  IEGEMLLQFPEEISARVLAYLKSCAEISYLGKQAKAVITVPAYFNDSQRQATKDAGTIAGL
TbHsp70.4   107  QGERITFFPPEEISARVLMVKMKKEAESYLGEKVKSAVITVPAYFNDSQRQATKDAGTIAGL
TbHsp70B    109  FGETIKFNPPEEISSMVLTKMKEAESYLGEKQKAVITVPAYFNDSQRQATKDAGTIAGL
TbHsp70      109  FGETIKFNPPEEISSMVLTKMKEAESYLGEKQAKAVITVPAYFNDSQRQATKDAGTIAGL
PfhHsp70-1  120  QGEKKLFHPPEEISSMVLTKMKENAEALGKSKNAVITVPAYFNDSQRQATKDAGTIAGL
HsHSPA6     110  GEDKILFFPPEEISSMVLTKMKETAAYLGLQPKFAVITVPAYFNDSQRQATKDAGTIAGL
HsHSPA1A    108  LGITKAFYFPEEISSMVLTKMKEIABAYLGYPVTNAVITVPAYFNDSQRQATKDAGTIAGL
BtHsc70     108  FGETKSFYFPEEISSMVLTKMKEIABAYLGKTVITNAVITVPAYFNDSQRQATKDAGTIAGL

```

```
EcDnaK      164 EVKRRIINEPTAAAIAYGLDKRGT--ERNRTAVADLGGGTFDSLTIEIDVDGKEITFEVLAT
TbHsp70.c   169 EVIRIINEPTAAAIAYGLDKADEGKERNVLIHFDLGGGTFDVSVISVS-----GIFEVKAT
TbHsp70.4   167 EVIRIINEPTAAAIAYGWDSSGEKMVTILIEDLGGGTFDVLTLNIDE-----GIFEVKAT
TcHsp70B    169 EVLRINEPTAAAIAYGLDKVEDGKERNVLIHFDLGGGTFDVTILTIDG-----GIFEVKAT
ThHsp70      169 EVIRIINEPTAAAIAYGLDKADEGKERNVLIHFDLGGGTFDVTILTIDG-----GIFEVKAT
PfHsp70-1   180 NVIRIINEPTAAAIAYGLHKKGKGEINLVLIHFDLGGGTFDVSULTIID-----GIFEVKAT
HsHSPA6     170 NVIRIINEPTAAAIAYGLDRGA-GERNVLIHFDLGGGTFDVSULSIDA-----GIFEVKAT
HsHSPA1A    168 NVIRIINEPTAAAIAYGLDTGK-GERNVLIHFDLGGGTFDVSULTIID-----GIFEVKAT
BtHsc70     168 NVIRIINEPTAAAITAYGLDKVVG-GERNVLIHFDLGGGTFDVSULTIID-----GIFEVKST
          ***.*****.***                *****.*****
```

|           |     |                                                             |
|-----------|-----|-------------------------------------------------------------|
| EcDnaK    | 222 | NGDTHLGGEDFD SRLINYL EEFKNDQ GIDLRNDPLA QRL EAAEAKIELSSAQTD |
| TbHsp70.c | 225 | NGDTHLGGEDFDAAL EHA AIN IYGLIEQGLSRLMLSLRLRRCBEVKRVLSISTVE  |
| TbHsp70.4 | 223 | AGDTHLGGEDFDRLVDYFATEFTIT TCKDILRGNARLRRLTACERAKRTLSSASTN   |
| TcHsp70B  | 225 | NGDTHLGGEDFDNRLVSHFT EFKRKNRGKDLITSORALRRLRTACERAKRTLSSAAQ  |
| TbHsp70   | 225 | NGDTHLGGEDFDNRLVHFT EEFKRNKRGKDLSSNLRALRRLTACERAKRTLSSAAQ   |
| PfHsp70-1 | 235 | AGDTHLGGEDFDNRLVNFCE EFKRKNRGKDLSSNLRALRRLTACERAKRTLSSSTQ   |
| HsHSPA6   | 225 | AGDTHLGGEDFDNRLVNHF EEF EFKRH GKDLSSNLRALRRLTACERAKRTLSSSTQ |
| HsHSPA1A  | 223 | AGDTHLGGEDFDNRLVNHF EEF EFKRH KKDISENKRRLRLTACERAKRTLSSSTQ  |
| BtHsc70   | 223 | AGDTHLGGEDFDNRVNHF EEF EFKRH KKDISENKRRLRLTACERAKRTLSSSTQ   |

EcDnaK 281 V N P Y T A T A T G P K H M N I K V T R A L E S V E D I V N R S E P F K V A L Q D A G S V S D I D V L V L V  
TbHsp70.c 285 T A D G L P L P --- G E F V L K I T R A R F E E L C T K F A R C L S V V Q F A L K D A S M K V E D I D V V L V L V  
TbHsp70.4 282 I E I D A L F - E --- G D F S K I T R A R F E E L C R D F R E R C L P V R K V L D A E D A S A D I D V L V L V  
TcHsp70B 284 I E I D A L F - E --- N D F Q A T I T R A R F E E L C G D L F R G T L Q P V E V L Q D A K M D R R A H D V L V L V  
TbHsp70 285 I E I D A L F - E --- N D F Q A T I T R A R F E E L C G D L F R G T L Q P V E V L Q D A K M D R R A H D V L V L V  
PfHsp70-1 295 I E I D S L F - E --- G I D F S V T V R A R F E E L C I D F R D T L P I V E K V L K D A M D R K S H E V V L V L V  
HsHSPA6 284 I E I D S L F - E --- G I D F Y T S I T R A R F E E L C S D L F R S T L P E V E K A L R D A K L D R A Q I H D V L V L V  
HsHSPA1A 282 I E I D S L F - E --- G I D F Y T S I T R A R F E E L C S D L F R S T L P E V E K A L R D A K L D R A Q I H D V L V L V  
BtHsc70 282 I E I D S L F - E --- G I D F Y T S I T R A R F E E L N A D L F R G T L P E V E K A L R D A K L D R S Q I H D V L V L V



Protein sequences for TbHsp70.c and its homologues and orthologues were retrieved from TriTrypDB and NCBI and their accession numbers are given in brackets: HsHSPA1A (AQY76873.1); HsHSPA6 (NP\_002146.2); BtHsc70 (NP\_776770.2); PfHsp70-1 (PF3D7\_0818900); *EcDnaK* - *E. coli* DnaK (NP\_414555.1); TbHsp70 (Tb927.11.11330); TcHsp70B (Tc00.1047053511211.170); TbHsp70.4 (Tb927.7.710); TbHsp70.c (Tb927.11.11290). ClustalW and Boxshade ([http://www.ch.embnet.org/software/BOX\\_form.html](http://www.ch.embnet.org/software/BOX_form.html)) software was used to generate this alignment. Identical residues are white against a black background, and similar residues are against a grey background.
